# Supplementary material
Source: PubMed Central journal article supplement (PMC2613117)

## SUPPLEMENTARY MATERIALS

### Supplementary Fig. 1 legend:

Fig. S1. Mathematical modeling of umbrella cell electrophysiological parameters. (A) Predicted changes in transepithelial conductance (TEC),  $V_a$ , TEV, and  $I_{sc}$  upon increased apical conductance of  $Na^+$  or/and  $K^+$  ions. (B) Predicted changes upon increased basolateral conductance of  $Na^+$  or/and  $K^+$  ions. (C) Predicted changes in TEV and  $I_{sc}$  upon sequentially increasing apical and then basolateral conductance of  $Na^+$  and  $K^+$  ions using two values for  $E_{Na}$  and  $E_K$ . (D) Circuit diagram of membranes and ion transport pathways in the umbrella cell.

### Supplementary Fig. 1 discussion:

**The apical and basolateral membrane contributions to the observed electrophysiological properties can be modeled mathematically**

Our data indicate that the phase 1 response of outward bowing and subsequent reversal of the electrophysiological parameters during phase 2 may result from the successive stretch of the apical and then basolateral membranes of the umbrella cell layer. To further confirm this possibility and also gain insight into the molecular mechanisms involved, we modeled umbrella cell electrophysiological responses assuming that the apical and basolateral membranes are stretched sequentially, and  $Na^+$  and  $K^+$  permeable ion channels are modulated upon stretch.

We and others have previously reported that stretch stimulates  $Na^+$  absorption via the amiloride-sensitive ENaC in the apical membranes of the umbrella cell layer (Lewis

*et al.*, 1977; Lewis and Wills, 1983; Lewis and Hanrahan, 1985; Wang *et al.*, 2003). Therefore, we first modeled the impact that an increase in the apical membrane conductance of  $\text{Na}^+$  would have on several electrophysiological parameters. In addition to causing apical membrane depolarization ( $V_a$ ), the increase in  $\text{Na}^+$  absorption would result in TEV hyperpolarization, an increase in  $I_{sc}$ , and an increase in transepithelial conductance (Fig. S1A), a response identical to that observed during phase 1 of outward bowing. We also modeled the condition where the apical membrane conductance was limited to an increase in  $\text{K}^+$  conductance via  $\text{K}^+$ -permeable ion channels. A response largely opposite of that observed for increased  $\text{Na}^+$  conductance was predicted (Fig. S1A). If the increase in apical membrane conductance was contributed equally by both  $\text{Na}^+$  and  $\text{K}^+$  permeable ion channels, a response similar to that observed for opening of  $\text{Na}^+$  permeable ion channels was observed (Fig. S1A), indicating that  $\text{Na}^+$  permeable ion channels may play a major role in the response observed when the apical membrane is stretched.

We also modeled events at the basolateral membrane, and observed that absorption of just  $\text{Na}^+$  permeable ion channels resulted in basolateral membrane and TEV depolarization, increased transepithelial conductance, and a decrease in the magnitude of  $I_{sc}$  (Fig. S1B), a response similar to that observed during phase 2 of outward bowing. Likewise, if stretch of the basolateral membrane resulted in an equal increase in conductance through both  $\text{Na}^+$  and  $\text{K}^+$  permeable channels, we would observe an increase in transepithelial conductance and a decrease in TEV and  $I_{sc}$ . In contrast, opening of  $\text{K}^+$  channels alone generally gave an opposite response to that we observed (Fig. S1B). Taken together these data indicated that the second phase of outward bowing may occur

in response to closing of  $K^+$  channels or increasing the influx of  $Na^+$  ions. Finally, we modeled the situation where we increased conductance of equal amounts of  $Na^+$  and  $K^+$  ions at the apical membrane, followed by increasing conductance of  $Na^+$  and  $K^+$  ions at the basolateral surface. We used different values for  $E_{Na}$  (45 or 55 mV) and  $E_K$  (-75 or -105mV), but in either case modeling showed an initial phase marked by hyperpolarization of TEV, a rise in  $I_{sc}$  and transepithelial conductance, followed by a second phase characterized by depolarization of TEV and a fall in  $I_{sc}$  (Fig. S1C). In summary, mathematical modeling provides further support of the distinctive function of the apical and basolateral membranes in modulating the electrophysiological responses to umbrella cell stretch.

## **Supplementary methods:**

### **Mathematical modeling of electrophysiological parameters**

Our mathematical model was based on previously described electrophysiological analysis of umbrella cells (Lewis *et al.*, 1977; Lewis *et al.*, 1978; Lewis and Wills, 1983; Lewis and Hanrahan, 1985; Horisberger, 1991) and the circuit diagram shown in Fig. S1D. The TER and TEV can be estimated from the following equations:  $TER = (R_a + R_b) * R_j / (R_a + R_b + R_j)$  and  $TEV = (V_a + V_b) * R_j / (R_a + R_b + R_j)$ , where  $R_j$  = the tight junction resistance,  $V_a$  = the apical membrane voltage, and  $V_b$  = the basolateral membrane voltage. Because  $R_j \cong \infty$  (Lewis *et al.*, 1977; Lewis and Wills, 1983; Lewis and Hanrahan, 1985), and remains very high even during stretch (Wang *et al.*, 2003), the above equations can be simplified to  $TER = R_a + R_b$  and  $TEV = V_a + V_b$ . The transepithelial conductance is equal to  $1/TER$ . Estimates of  $R_a$  (20000  $\Omega \cdot \mu F$ ),  $R_b$  (1000  $\Omega \cdot \mu F$ ),  $V_a$  (40

mV) and  $V_b$  (- 70 mV) were described previously (Lewis *et al.*, 1977; Lewis *et al.*, 1978; Lewis and Wills, 1983; Lewis and Hanrahan, 1985; Horisberger, 1991).  $V_a$  and  $V_b$  are essentially dependent on the potential difference of  $\text{Na}^+$  and  $\text{K}^+$  and their relative conductances according to the following equation:  $V_{a/b} = (G_{a/b\text{Na}} * E_{\text{Na}} + G_{a/b\text{K}} * E_{\text{K}}) / (G_{a/b\text{Na}} + G_{a/b\text{K}})$ , where  $G_{a/b\text{Na}}$  and  $G_{a/b\text{K}}$  are the respective conductances of  $\text{Na}^+$  or  $\text{K}^+$  at the apical (a) or basolateral (b) membrane domain. The equilibrium potential for  $\text{Na}^+$  ( $E_{\text{Na}}$ ) or  $\text{K}^+$  ( $E_{\text{K}}$ ) was determined using the Nernst equation and typical values of  $E_{\text{Na}}$  (45 – 55 mV) and  $E_{\text{K}}$  (-75 – -105 mV).  $I_{\text{sc}}$  was calculated by  $(V_a + V_b) / (R_a + R_b)$ .

## References

- Horisberger, J.D. (1991). Apical and basolateral membrane conductances in the TBM cell line. *Am J Physiol* 260, C1172-1181.
- Lewis, S.A., Eaton, D.C., Clausen, C., and Diamond, J.M. (1977). Nystatin as a probe for investigating the electrical properties of a tight epithelium. *J Gen Physiol* 70, 427-440.
- Lewis, S.A., and Hanrahan, J.W. (1985). Apical and basolateral membrane ionic channels in rabbit urinary bladder epithelium. *Pflugers Arch* 405 *Suppl 1*, S83-88.
- Lewis, S.A., and Wills, N.K. (1983). Apical membrane permeability and kinetic properties of the sodium pump in rabbit urinary bladder. *J Physiol* 341, 169-184.
- Lewis, S.A., Wills, N.K., and Eaton, D.C. (1978). Basolateral membrane potential of a tight epithelium: ionic diffusion and electrogenic pumps. *J Membr Biol* 41, 117-148.
- Wang, E.C., Lee, J.M., Johnson, J.P., Kleyman, T.R., Bridges, R., and Apodaca, G. (2003). Hydrostatic pressure-regulated ion transport in bladder uroepithelium. *Am J Physiol Renal Physiol* 285, F651-663.

# Yu et al Supplementary Figure 1

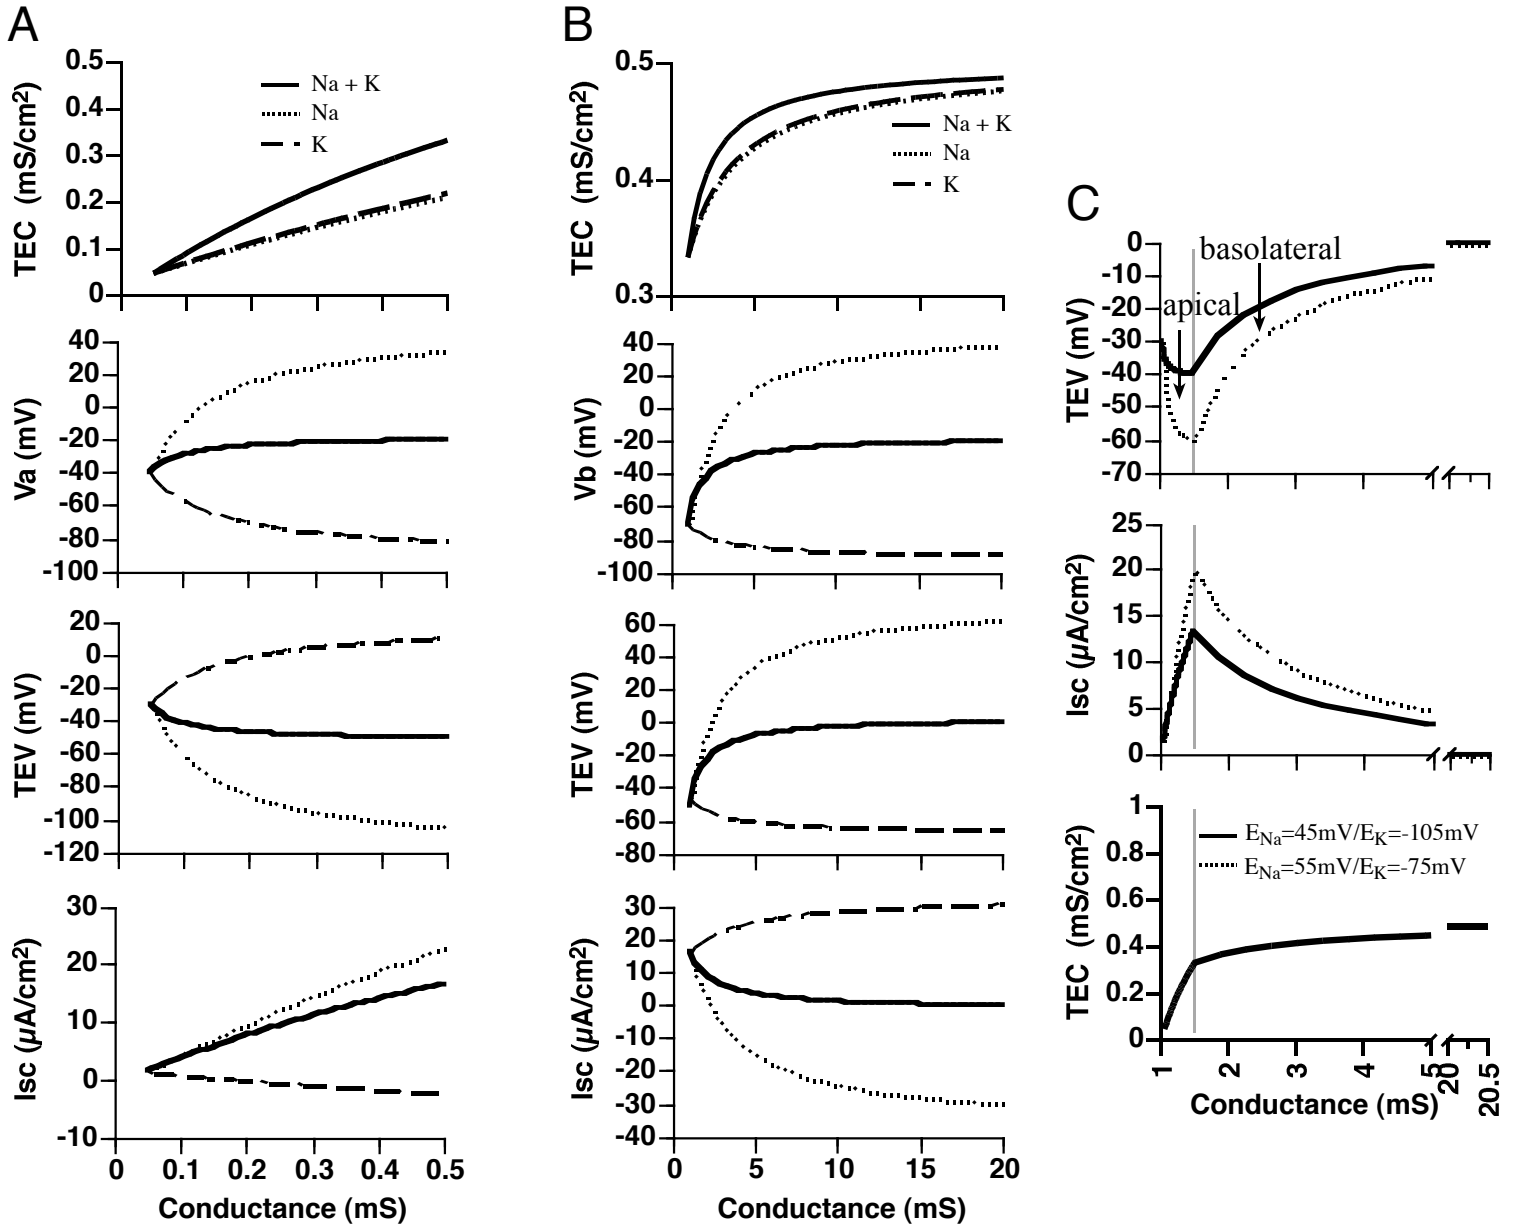

Supplement: E08-04-0439_1.pdf [file E08-04-0439_1.pdf]
